# Identification of Differentially Expressed Genes Relevant to Corm Formation in *Sagittaria trifolia*

Libao Cheng<sup>1</sup>\*, Shuanyan Li<sup>1</sup>\*, Xiaoyong Xu<sup>1</sup>, Javeed Hussain<sup>2</sup>, Jingjing Yin<sup>1</sup>, Yi Zhang<sup>1</sup>, Liangjun Li<sup>1</sup>\*, Xuehao Chen<sup>1</sup>\*

**1** School of Horticulture and Plant Protection of Yangzhou University, Yangzhou, Jiangsu, People's Republic of China, **2** China-UK HUST-RRes Genetic Engineering and Genomics Joint Laboratory, College of Life Science and Technology of Huazhong University of Science and Technology, Wuhan, Hubei, People's Republic of China

## Abstract

*Sagittaria trifolia* is a good model of wetland plants to elucidate the formation of corm. However, few studies have been conducted to uncover the complexity of gene expression involved in corm formation. In this study, high-throughput tag-sequencing based on Solexa Genome Analyzer Platform was applied to monitor the changes in gene expression with three libraries of differentially expressed genes (DEGs) (C1 library: stolon stage, C2 library: initial swelling stage and C3 library: swelling stage) during corm formation in *Sagittaria trifolia*. Approximately 6.0 million tags were sequenced, and 5854021, 5983454, and 5761079 clean tags including 138319, 116804, and 101739 distinct tags were obtained after removal of low quality tags from each library, respectively. About 46% distinct tags were unambiguous tags mapping to the reference genes, and 33% were unambiguous tag-mapped genes. Totally, 20575, 19807, and 18438 were annotated in C1, C2, and C3 libraries, respectively, after mapping their functions in existing databases. In addition, we found that profiling of gene expression in C1/C2 and C2/C3 libraries were different among most of the selected 20 DEGs. Most DEGs in C1/C2 libraries were relevant to hormone synthesis and response; energy metabolism and stress response, while most of the genes in C2/C3 libraries were involved in carbohydrate metabolism. All up-regulated transcriptional factors and 16 important genes relevant to corm formation in three libraries were also identified. To further analyze the expression of 9 genes, from the results of tag-sequencing, qRT-PCR was applied. In summary, this study provides a comprehensive understanding of gene expression, during the formation of corm in *Sagittaria trifolia*.

**Citation:** Cheng L, Li S, Xu X, Hussain J, Yin J, et al. (2013) Identification of Differentially Expressed Genes Relevant to Corm Formation in *Sagittaria trifolia*. PLoS ONE 8(1): e54573. doi:10.1371/journal.pone.0054573

**Editor:** Meng-xiang Sun, Wuhan University, China

**Received:** November 1, 2012; **Accepted:** December 12, 2012; **Published:** January 24, 2013

**Copyright:** © 2013 Cheng et al. This is an open-access article distributed under the terms of the Creative Commons Attribution License, which permits unrestricted use, distribution, and reproduction in any medium, provided the original author and source are credited.

**Funding:** This work was supported by the Special Fund for Agro-scientific Research in the Public Interest (200903017-02), China Postdoctoral Science Foundation (2012M511805) and Jiangsu Postdoctoral Science Foundation (1102144C). The funders had no role in study design, data collection and analysis, decision to publish, or preparation of the manuscript.

**Competing Interests:** The authors have declared that no competing interests exist.

\* E-mail: ljli@yzu.edu.cn (LL); xhchen@yzu.edu.cn (XC)

These authors contributed equally to this work.

## Introduction

*Sagittaria trifolia*, a member of the family Alismataceae, is an aquatic herb vegetable and widely cultivated in China. The corm of *Sagittaria trifolia* is very popular in the daily diet because of its richness in nutrients including starch, proteins, vitamins, and mineral substances [1]. China exports the processed products of *Sagittaria* to Asian countries as a kind of off-season vegetable [2]. In addition, it is also an important ingredient in the traditional medicine in treating wounds, headaches, indigestion and rheumatism [3].

During the whole growth season from March to October, *Sagittaria trifolia*, like most wetland species, is grown in the shallow water, such as the pools, water gardens, tanks or tubs in the greenhouse, which indicates that the plant has developed mechanisms of surviving in the submerged environment. For the regeneration of this plant, bare root stocks or seedlings are directly planted into wetland soil. Several buds from the main stem develop into stolons, and the corms are formed at the tips of each stolon [4]. Actually, corm, tuber, rhizome and bulbs are kinds of underground stems, and work as storage organs. These are storage

units for food that provide the plants with the energy for growth, blooming, and completing their lifecycle.

The process of corm formation (similar with potato) can be classified into three stages: induction, initial swelling, and swelling stage [5]. Stolon tips grow radially in the induction stage. In the second stages, longitudinal growth of stolon stops and its tips swell [6]. At this swelling stage, great amounts of carbohydrates are synthesized in the storage. Starch content in *Sagittaria trifolia* corm consists of 10–20% of total fresh weight. Essentially, all above processes are controlled by the signal molecules and environmental factors [7,8].

Swelling processes of underground plant storage organs (tuber, corm, rhizome, and bulb) have been extensively studied in tuber as compared with other underground stems (corm, rhizome, and bulb). Great changes have been found in genetic and morphometric processes during the formation of storage organs [9,10].

Similar with tuber development of potato, corm formation of *Sagittaria trifolia* is also under a strict photoperiodic control. The formation of corm is promoted in short days (SD), but prolongs in long days (LD) [11]. It is reported that the signal of photoperiodic control is perceived by the leaf, and then transported via the

phloem to the vegetative shoot apex or underground stolon tips, which promotes the transition of storage organ. *Flowering Locus T*, *LKP2*, *CONSTANS* and *GIGANTEA* has been found to be involved in the signal transduction of photoperiodic control, and these gene expressions affect the formation of storage organ [12,13,14,15].

Chen et al. (2004) find that formation of storage organ is promoted by StBEL5 and KNOX through repressing the gibberellin StGA20ox1 biosynthesis under SD condition [16]. At the same time, the expression of StBEL5 is enhanced by miR172, suggesting that long distance transport of RNA signal also participates in the formation of underground storage organ [17]. In addition, PHYB is also involved in the formation of storage organ in SD. Decreasing the levels of PHYB in transgenic plants lead to the formation of storage organ both in SD and LD. Compared with transgenic plants, control can form storage organ in SD [18], suggesting that plants lose the inhibitory effect on tuberization caused by LD [12]. At present, high sucrose content is reported to be the optimal condition required for the formation of storage organs [12]. During the early stages of storage organ development, it requires an active sucrose transporter to trigger the formation of storage organ [19], which indicates that the role of sucrose is necessary for the formation of storage organ at the initial swelling stages [20].

Evidence shows that several phytohormones including: gibberellic acid (GA), cytokinin, jasmonic acid, abscisic acid (ABA), indole acetic acid (IAA), ethylene and jasmonate are also involved in the initiation and regulation of growth in these storage organs [6,21,22,23]. It has been reported that exogenous application of GA acts as an inhibitor of tuber induction. Overexpression of GA oxidase gene in transgenic potato plants postpones the tuber development. Whereas, inhibition of this gene results in an early tuberization than wild type plants [19,24]. Cytokinin and jasmonic acid promote the tuber induction and elongation [25]. Bhat et al [26] found that exogenous cytokinin is necessary to induce formation of tuber in ginger due to improvement of photosynthesis. ABA shows high correlation to tuber formation because ABA-deficient potato plants show retarded tuberization [27]. Exogenous application of auxin on the decapitated peas and potatoes inhibits the formation of axillary buds [28]. Ethylene, produced by almost all plants mediates a variety of developmental processes in plants, such as seed germination, lateral bud stimulation, adventitious rooting, overcoming dormancy and organ senescence and abscission [23,29]. Exogenous ethylene is believed as an inducer for the tuberization in potato and root bulking in carrots [30].

Just like the other storage organs, corm of *Sagittaria trifolia* is also an important edible product, and the developmental processes of this kind of storage organ is regulated by many genes [8]. These differentially expressed genes (DEGs) promote the formation of corm. Although much work in other species has partially described the above processes, expression of genes which affect corm formation in *Sagittaria trifolia* is has not been studied in detail. Especially in potato, many tuber related genes have been documented [31]. High throughput transcriptome assembly has been established as an efficient approach to study gene expression in different environmental conditions [32,33]. A lot of important genes involved in plant critical metabolisms have been successfully identified from horticultural species, such as cucumber, potato, tomato, and Chinese cabbage [34,35,36,37]. In this study, DEGs from three developmental stages of *Sagittaria trifolia* corm were sequenced and analyzed with aim to comprehensively understand the processes of corm formation at molecular level. qRT-PCR method was also applied to evaluate expression characteristics of some genes involved in corm formation.

## Materials and Methods

### Plant Materials

*Sagittaria trifolia* cv. Sinensis which is commonly cultivated in China for daily diet, was planted in the field with water depth of 20 cm in spring with average temperature 25°C/day and 17°C/night during the whole growth season. Several stolons developed and elongated in proper order in each plant. When plants grew up to 8–10 leaves stage (about 100 days after plantation), formation of corm started at stolon tips. Corms of three developmental stages (stolon, initial swelling, and swelling stage) from the plants (five tips from different plants were combined for each stage) were used for analysis of tag-sequencing and gene expression. To get the materials of different developmental stages, plants were cultivated in a field (non-private), located in the South-Eastern China. The permission for sample collection was taken from the Department of Horticulture of YangZhou University, China. No specific permissions were required for the location and the field studies, because the experiments did not involve any endangered or protected species.

### Screening the DEGs

Corm transcriptome from the above three development stages was analyzed. Stolon tips, corms in the initial swelling and swelling stages were collected and ground, and the RNA was isolated from the ground samples using RNA extraction mini kit (QIAGEN, Germany). DNaseI was added to eliminate DNA contamination. Sequencing of the transcripts in the form of special constructs was completed by Beijing Institute of Genomics (BIG).

To screen the DEGs, transcriptome from these three stages was analyzed with the aspirations to track the major changes in the metabolism. RNA was isolated from the materials of these three stages. The DEG libraries of the three samples were determined in parallel using Illumina gene expression sample preparation kits. Briefly, the total RNA from three stages was used for mRNA capture with magnetic oligo (dT) beads. The first and second strand cDNA were synthesized, and bead-bound cDNA was subsequently digested with *NlaIII*.

The 3'-cDNA fragments attached to the oligo (dT) beads were ligated to the Illumina GEX *NlaIII* adapter 1, which contained a recognition site for the endonuclease *MmeI* for cutting 17 bp downstream of the recognition site (CATG) to produce tags with adapter 1. After removing the 3' fragment via magnetic beads precipitation, an Illumina GEX adapter 2 was introduced at the site of *MmeI* cleavage. The resulting adapter-ligated cDNA tags were amplified using PCR-primers that were annealed to the adaptor ends for 15 cycles.

The 85 base fragments were purified and recovered by 6% polyacrylamide Trisborate-EDTA gel. The final quality of the tagged sequences was checked by an Agilent 2100 Bioanalyzer. The three tag libraries constructed underwent Illumina proprietary sequencing chip for cluster generation through *in situ* amplification and were deep-sequenced using Illumina Genome Analyzer. For the raw data, we filtered adaptor sequences, low quality tags (tags with unknown nucleotides N), empty reads and tags that were too short or too long, and tags with only one copy to get clean tags. The types of clean tags were represented as the distinct clean tags. Subsequently, we classified the clean tags and distinct clean tags according to their copy number in the library, and showed their percentage in the total clean and distinct tags, and analyzed saturation of the three libraries.

For annotation, all tags were mapped to the reference sequence of NCBI database (<http://www.ncbi.nlm.nih.gov/>), and no more than 1-bp nucleotide mismatch was allowed. The alignment

procedures were conducted essentially by following the protocols described in the online documentation (<http://maq.sourceforge.net>) and adopting the default parameter values. To monitor mapping events on both strands, both sense and complementary antisense sequences were included in the mapping process. The tags mapped to reference sequences from multiple genes were filtered [34].

## Identification of DEGs

The transcriptome of the *Sagittaria trifolia* from the above three stages was used as reference for the screening and analysis of the DEGs due to unavailability of the existing data. All expressed genes were monitored, and the gene functions were explored by using database annotations like nr, Swiss-Prot, KEGG, and COG with following criteria: for the gene annotations, blastx alignment (evalue<0.00001) between unigenes and protein databases, such as Swiss-Prot, KEGG, and COG were performed. Best aligning results were used to decide sequence direction and functions of the unigenes.

In case of any conflict in the results from different databases, a priority order of nr, Swiss-Prot, KEGG, and COG was followed when deciding sequence direction of unigenes. When a unigene happened to be unaligned with none of the above databases, ESTscan was used to predict its coding regions as well as to decide its sequence direction. All of the expressed unigenes were classified according to their functions in metabolism processes. For screening the differentially expressed genes, “FDR≤0.001” and the absolute value of “log<sub>2</sub> Ratio ≥1” were used as a threshold to judge the significance of difference in expression of unigenes.

## Gene Expression Analysis by qRT-PCR

Quantitative RT-PCR analysis was performed to quantify the transcriptional level of nine novel genes associated with corm formation. Total RNAs were extracted using RNA extraction mini kit (QIAGEN, Germany) from stolon tips, corms of initial swelling stage, and swelling stage respectively. DNaseI was used to digest DNA during the RNA extraction process to eliminate DNA contamination. A total of 1–2 μg of RNA was used in cDNA synthesis according to the manufacturer’s instructions (Promega, USA). The quantitative RT-PCR reaction was performed with the Mx 3000P machine (STRATAGENE, <http://www.stratagene.com>). The SYBR Green Master Mix was used to identify mRNA level according to the manufacturer’s instructions (Tiangen, China).

According to the results of sequencing, the primers used for nine genes relevant to corm formation were designed which are listed in Table 1. *β-Actin* of *Sagittaria trifolia* was used as internal standard and amplified with the primers, forward: 5′-AACCTCCTCCT-CATCGTACT-3′, and reverse: 5′-GACAGCATCAG CCAATGTTCA-3′. Amplification was performed in a 20 μl reaction mixture, containing 0.16 mM dNTPs, 0.1 μM forward and reversed primers respectively, 1 mM MgCl<sub>2</sub>, 0.4 U Taq polymerase (Tiangen, China), and 1 μl cDNA. The PCR program consisted of 30 cycles: 94°C for 10 min; 94°C for 1 s; 56–60°C for 30 s; 72°C for 60 s, and the final extension at 72°C for 10 min. Triplicate samples were used for quantitative RT-PCR.

## Results

### 2.1 Transcriptome Profile during Corm Formation

To investigate the genes involved in corm development, three libraries were constructed from the three stages of corm formation: stolon stage, initial swelling, and swelling stages using the Illumina sequencing platform. Before mapping the tags, the transcriptome

of three above stages were preprocessed, and a total of 59909 genes which included 43778 (accounted for 70.07%) CATG site genes used as reference genes were obtained.

Overall, about 6 million tags in each library were obtained with 328156, 273762, and 236840 distinct tags respectively. To get clean tags, all the raw tags were filtered with reference sequences, and 5854021, 5983454, and 5761079 clean tags were obtained including 138319, 116804, and 101739 distinct clean tags in C1, C2, and C3 libraries respectively. Complete data of tags for each library is given in Table 2. The analysis of sequencing saturation was also performed in the three libraries to estimate whether or not the sequenced tags were sufficient to cover the whole transcriptome. We found that the number of detected genes increased until the sequencing tags reached 3 million or more, which indicated that the identified expressed tags were enough to reflect the whole transcriptional information of *Sagittaria trifolia* genome (Fig. S1).

BLASTx was applied to annotate distinct gene functions by comparison with existing NCBI database using a cut-off E-value of 10<sup>-5</sup>. Among which, approximately 47% of all distinct sequences in three libraries showed an above cut-off BLAST result, and about 53% did hot match with the known genes. These genes could be classified into 26 catalogues according to their functions. One catalogue containing the largest number of genes contained the genes with predicted functions, and the smallest one was related to cell structure (Fig. S2). The copy distribution of total and distinct clean tags in three libraries showed the same tendency with about 5% of distinct clean tags higher than 100 copies and about 30% tags being in 5–50 counts. The number of distinct clean tags between 2–5 copies (approximate 45%) was high as compared with that of others (Fig. 1).

### 2.2 DEGs in Three Libraries

**Gene expression profiles during corm formation.** Three libraries were examined to identify gene expression profiles during corm formation. Total 18519, 18012, and 16839 transcripts were identified from C1, C2, and C3 libraries respectively. Among which, 14968 genes were expressed in all three libraries, 16206 expressed genes were found in both C1 and C2, and 15537 genes existed in both C2 and C3 libraries, respectively (Fig. 2).

DEGs were identified from these three different developmental stages during corm formation to uncover the changes in metabolisms at molecular event. The abundance of transcripts in three libraries was counted by the number of genes per million clean tags (TPM). FDR (false discovery rates) <0.001 and the absolute value of |log<sub>2</sub> Ratio| ≥1 were used as a threshold to judge whether gene expression was significant. A total of 3011 genes were found to change their transcriptional level in C1/C2 libraries. From which, 1344 were up-regulated (Table S1) and 1667 were down-regulated (data was not shown). In C2/C3 libraries, 2195 genes, including 214 up-regulated genes (Table S1) and 1981 down-regulated genes (data was not shown) altered the expression. A great change was observed in C1/C3 libraries, with changes in transcriptional level of 4643 genes including 616 up-regulated and 3027 down-regulated (Table 3). According to the gene expression profile, a large number of genes showed altered mRNA expression levels in C1/C2 libraries. However, number of transcripts in C2/C3 libraries showed a little change as compared with C1/C2 libraries, suggesting that metabolisms from stolon stage to initial swelling stage were different with that from initial swelling stage to swelling stage.

**Most DEGs in each library.** In total, 3011 and 2095 genes altered their expression in C1/C2 and C2/C3 libraries, respectively. Therefore, 20 DEGs with higher levels of changes were

**Table 1.** Detail information about primers used for qRT-PCR variation.

| Gene            | Forward primer (5'-3') | Reverse primer (5'-3') | Tm (°C) | Product (bp) |
|-----------------|------------------------|------------------------|---------|--------------|
| <i>KOS</i>      | GTATCTTGGGAGCCGCTG     | CATTCTTACGCATGGCAA     | 56      | 354          |
| <i>ABA8OX</i>   | CAAACCCAACACTTTCATC    | TTGTCATTCTACAAAATATTC  | 54      | 287          |
| <i>CLP</i>      | CTCGTACAGAGTCTGGAATT   | GTCATTCTTTTTCTGTAGTCC  | 58      | 300          |
| <i>AP2/ERF</i>  | TCGTCTACGTCTTCCTCAA    | TCAATGACATCGTTCCTCG    | 56      | 220          |
| <i>PLP</i>      | ATCCCTGCGGTAGTGCTTC    | CATCCTTCTCGGTGGGT      | 55      | 235          |
| <i>SnRK1</i>    | GCTCTGTTGGGAAAGGTT     | ACTTTTTTCATCCATGTCCA   | 52      | 356          |
| <i>GIGANTEA</i> | CCGAATCCTTTCTCAGCTAC   | CCATAAGCAGCCTCCAG      | 53      | 212          |
| <i>FD</i>       | AAGTATCATTTCGACAAACA   | GAAGCCGAAGAGTAGTGAG    | 56      | 322          |
| <i>Lox</i>      | GAGTACGAGTACCAGGTGAAG  | AGAAGGGATCTTACCAGTCAC  | 58      | 263          |

doi:10.1371/journal.pone.0054573.t001

selected in C1/C2 and C2/C3 libraries, respectively, to monitor changes in metabolism during corm formation. We found that the most DEGs in C1/C2 libraries belonged to short-chain dehydrogenase/reductase family proteins. DEGs in C1/C2 libraries could be mainly classified into 3 catalogues which belonged to hormone metabolism or response (Ent-kaurene oxidase CYP701A5, Ent-kaurene synthase, CYP707A4 (ABA 8-hydroxylases, AP2/ERF domain-containing transcription factor), energy metabolism (Short-chain dehydrogenase/reductase family protein, Secoisolariciresinol dehydrogenase, and FAD-binding domain containing protein) and stress response proteins (heat shock proteins, wound-responsive family proteins, heavy metal-associated domain containing proteins, anaerobically inducible early genes). In addition, a calmodulin-like protein and myb family transcription factors were also found to be involved in C1/C2 library (Table 4).

In C2/C3 libraries, a great number of genes were involved in storage such as glutathione S-transferase gene, globulin synthesis gene, sucrose synthase, patatin synthesis gene and starch synthesis gene. At the same time, one corm swelling related gene (extension-like protein) and energy metabolism (NAD-dependent malate dehydrogenase) were observed to alter their expression. From above results of gene expression, we conclude that several genes are very important and necessary for corm development in C1/C2 stages, such as ERF domain-containing transcription factor, genes relevant to hormone metabolism (Ent-kaurene oxidase CYP701A5, Ent-kaurene synthase and ABA 8-hydroxylase), calmodulin-like protein and calmodulin binding protein (Table 4). It was observed that a lot of genes were down regulated in C1/C2 and C2/C3 libraries, most of which in C1/C2 libraries were involved into synthesis of substances, and others in C2/C3

**Table 2.** Categorization and abundance of tags.

|                                 |                                      | C1      | C2      | C3      |
|---------------------------------|--------------------------------------|---------|---------|---------|
| Raw Tag                         | Total number                         | 6047232 | 6143854 | 5899315 |
|                                 | Distinct Tag                         | 328156  | 273762  | 236840  |
| Clean Tag                       | Total number                         | 5854021 | 5983454 | 5761079 |
|                                 | Distinct Tag number                  | 138319  | 116804  | 101739  |
| All Tag Mapping to Gene         | Total number                         | 3096297 | 2896510 | 2172619 |
|                                 | Total percentage of clean tag        | 52.89%  | 48.41%  | 37.71%  |
|                                 | Distinct Tag number                  | 65279   | 54635   | 46104   |
|                                 | Distinct Tag percentage of clean tag | 47.19%  | 46.77%  | 45.32%  |
| Unambiguous Tag Mapping to Gene | Total number                         | 3080868 | 2883680 | 2165209 |
|                                 | Total percentage of clean tag        | 52.63%  | 48.19%  | 37.58%  |
|                                 | Distinct Tag number                  | 64966   | 54369   | 45871   |
|                                 | Distinct Tag percentage of clean tag | 46.97%  | 46.55%  | 45.09%  |
| All Tag-mapped Genes            | Total number                         | 20714   | 19941   | 18594   |
|                                 | Percentage of reference genes        | 34.58%  | 33.29%  | 31.04%  |
| Unambiguous Tag-mapped Genes    | Total number                         | 20575   | 19807   | 18438   |
|                                 | Percentage of reference genes        | 34.34%  | 33.06%  | 30.78%  |
| Unknown Tag                     | Total number                         | 2757724 | 3086944 | 3588460 |
|                                 | Total percentage of clean tag        | 47.11%  | 51.59%  | 62.29%  |
|                                 | Distinct Tag number                  | 73040   | 62169   | 55635   |
|                                 | Distinct Tag percentage of clean tag | 52.81%  | 53.23%  | 54.68%  |

doi:10.1371/journal.pone.0054573.t002

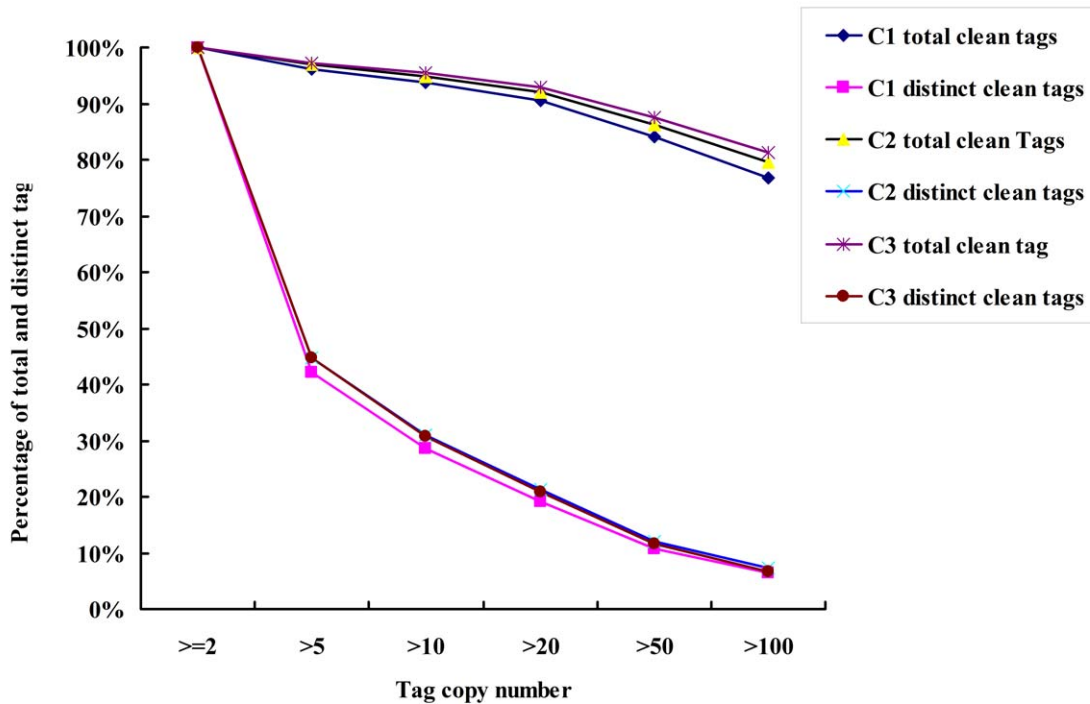

**Figure 1. Distribution of total clean tags and distinct clean tags counts from the three libraries.**  
doi:10.1371/journal.pone.0054573.g001

libraries were relevant to cell growth and differentiation, translation, RNA process and modification (data not shown).

Some transcription factors were also identified which are important in regulating the gene expression during corm formation. We summarized all the up-regulated transcriptional factors in C1/C2 and C2/C3 libraries. A total of 19 and 14 transcription factors were found in C1/C2 and C2/C3 libraries, respectively (Table 5). In C1/C2 libraries, some of transcription factors were ethylene responsive proteins (AP2/ERF, ERF2b and ERF2), Myb, CaM-binding transcription factor, WRKY45, NAC, bZIP, NPR1-like protein, and bHLH transcription factors. In C2/

C3 libraries, expression levels of many important regulators (e.g. ERF3, HSP8, MYB, CKB3, SCL11, JMJC, bHLHb, ATAIB, GPR11, and others) were enhanced, most of which are involved in storage metabolism and stress response (Table S1).

**Genes related to corm formation.** The data sets of this experiment were compared to those reported previously with the aims to test whether the transcription patterns had coverage of the well-defined genes. We found that 16 identified genes relevant to corm formations were found to change their transcriptional level. The expression of these genes and their biological functions are listed in Table 6. Among which, 8 genes including flowering locus D, zinc finger CONSTANS-like protein, SFT1 family, cycling dof factor, BEL1-like HD transcription factor, sucrose synthase, Ca<sup>2+</sup>/Calmodulin-like protein, and lipoxygenase enhanced their transcriptional levels, and 1 gene photoperiod sensitivity 5 (SE5) did not show any significant change in its expression in all the three libraries. Seven genes (GIGANTEA, MADS-box transcription factor, FRUITFUL-like protein, Class I knox protein, Knox

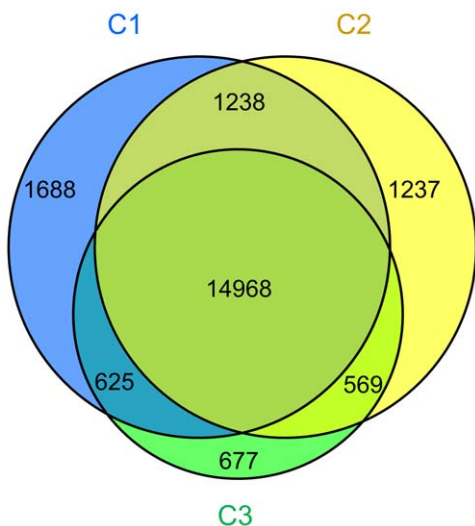

**Figure 2. Analysis of tag mapped genes among three libraries.**  
doi:10.1371/journal.pone.0054573.g002

**Table 3. DEGs across all libraries.**

|                | C1:C2 | C1:C3 | C2:C3 |
|----------------|-------|-------|-------|
| Total          | 3011  | 4643  | 2195  |
| Up-regulated   | 1344  | 616   | 214   |
| Down-regulated | 1667  | 3027  | 1981  |

All the genes mapped to the reference sequence and genome sequences were examined for their expression differences across the different libraries. Numbers of differentially expressed genes represent transcripts, using threshold values  $FDR \leq 0.001$  and  $|\log_2 \text{Ratio}| \geq 1$  for controlling false discovery rates. C1, C2 and C3 represent the samples which were collected at stolon stage, initial swelling stage and swelling stage of corm respectively.  
doi:10.1371/journal.pone.0054573.t003

**Table 4.** 20 most differentially expressed annotated genes in C1/C2 and C2/C3 libraries based on expressed tag frequency. “-” represents the down-regulation of gene.

| Gene ID                              | Relative abundant (TMP ratio) | Function annotation                                |
|--------------------------------------|-------------------------------|----------------------------------------------------|
| <b>C1/C2 libraries C1/C2 (C2/C3)</b> |                               |                                                    |
| C56569                               | 13.124 (-4.541)               | Short-chain dehydrogenase/reductase family protein |
| C58652                               | 13.056 (-4.493)               | FAD-binding domain-containing protein              |
| C59382                               | 13.005 (-6.715)               | Ent-kaurene oxidase CYP701A5                       |
| C48238                               | 12.972 (-4.783)               | Acid phosphatase (APase)                           |
| C58140                               | 12.895 (-11.714)              | Resistant specific protein-3                       |
| C8055                                | 12.215 (-0.127)               | ABA 8-hydroxylases                                 |
| C6524                                | 11.897 (-11.139)              | Polygalacturonase-inhibiting protein               |
| C56037                               | 11.725 (-5.967)               | 3-oxoacyl-[acyl-carrier-protein] reductase         |
| C50776                               | 11.198 (2.514)                | Heat shock protein                                 |
| C18552                               | 10.899 (-10.455)              | Ent-kaurene synthase                               |
| C54634                               | 10.968 (-3.848)               | SMO2-2                                             |
| C42905                               | 10.568 (-10.171)              | Secoisolariciresinol dehydrogenase                 |
| C55007                               | 10.498 (1.097)                | Temperature-induced lipocalin                      |
| C41767                               | 10.478 (-4.034)               | Wound-responsive family protein                    |
| C57234                               | 10.332 (-4.006)               | PRH19                                              |
| C1731                                | 10.325 (-2.616)               | Calmodulin-like protein                            |
| C54598                               | 10.112 (1.277)                | Calmodulin binding protein                         |
| C35117                               | 9.698 (-9.489)                | Anaerobically inducible early gene 2               |
| C52384                               | 9.236 (-3)                    | AP2/ERF domain-containing transcription factor     |
| C17437                               | 9.056 (-1.939)                | Myb family transcription factor                    |
| <b>C2/C3 libraries C2/C3 (C1/C2)</b> |                               |                                                    |
| C49391                               | 23.659 (6.998)                | Heat shock protein                                 |
| C8325                                | 20.785 (-92224)               | WRKY69                                             |
| C23809                               | 20.582 (-6.672)               | NAD-dependent malate dehydrogenase                 |
| C15100                               | 20.258 (7.443)                | Oxidoreductase                                     |
| C55126                               | 19.923 (-5.672)               | Pollen Ole e 1 allergen and extensin               |
| C16333                               | 18.255 (-7.098)               | Patatin-like protein                               |
| C2677                                | 15.241 (0.439)                | Nodulin-like protein                               |
| C50994                               | 10.362 (-7.267)               | K-exchanger-like protein                           |
| C55452                               | 7.968 (2.365)                 | Ribosome biogenesis regulatory protein homolog     |
| C56648                               | 7.835 (-5.672)                | Metalloproteinase                                  |
| C12295                               | 7.725 (-7.267)                | Nuclear transport receptor exportin 4              |
| C41931                               | 7.251 (-3.658)                | 11S globulin precursor isoform 2A                  |
| C8797                                | 7.211 (-6.672)                | Helicase-like protein                              |
| C53039                               | 7.191 (1.365)                 | Extensin-like protein                              |
| C39310                               | 7.135 (-5.672)                | Glutathione S-transferase                          |
| C37931                               | 7.084 (-5.688)                | Calcium:sodium antiporter/cation:cation antiporter |
| Gene ID                              | Relative abundant (TMP ratio) | Function annotation                                |
| C25514                               | 7.0364 (-9.564)               | IAA-amino acid hydrolase ILR1                      |
| C5064                                | 7.043 (0.125)                 | Sucrose non-fermenting related protein kinaseI     |
| C49862                               | 6.709 (4.365)                 | NAC domain protein                                 |
| C41150                               | 6.702 (1.937)                 | GBSSI                                              |

doi:10.1371/journal.pone.0054573.t004

protein partner, ADP/ATP translocator-like, AFB auxin receptor protein PintaTIR1) directly decreased their expression during the corn formation.

### 2.3 Expression Analysis of Nine Genes through qRT-PCR

To investigate the changes of gene expression at the mRNA level, we performed quantitative RT-PCR for nine genes which

**Table 5.** Expression abundance of up-regulated transcriptional factors during corm formation.

| Gene ID      | Relative abundant (TMP ratio) | Function annotation                                    |
|--------------|-------------------------------|--------------------------------------------------------|
| <b>C1/C2</b> |                               |                                                        |
| C52384       | 9.108                         | AP2/ERF domain-containing transcription factor         |
| C17437       | 8.870                         | Myb family transcription factor                        |
| C24919       | 8.840                         | Transcription factor RF2b                              |
| C3379        | 6.643                         | CaM-binding transcription factor                       |
| C57104       | 6.510                         | bZIP transcription factor bZIP17                       |
| C12669       | 5.643                         | WRKY45 transcription factor                            |
| C47594       | 5.425                         | Transcription factor jumonji domain-containing protein |
| C13894       | 5.044                         | Transcription factor PCF8                              |
| C8257        | 5.125                         | Transcription factor                                   |
| C17055       | 5.118                         | Transcription factor HY5                               |
| C12723       | 5.101                         | bHLH transcription factor PTF1-like                    |
| C43302       | 5.098                         | MADS box transcription factor                          |
| C53480       | 5.044                         | Ethylene responsive transcription factor 2b            |
| C18355       | 3.051                         | ERF2 transcription factor                              |
| C58603       | 2.981                         | Arabidopsis NAC domain containing protein              |
| C18200       | 1.912                         | Regulatory protein NPR1-like                           |
| C36044       | 1.493                         | Scarecrow-like transcription factor 11                 |
| C9570        | 1.071                         | DNA binding/protein binding/transcription factor       |
| C47273       | 1.007                         | LIM transcription factor homolog                       |
| <b>C2/C3</b> |                               |                                                        |
| C59162       | 8.022                         | Heat shock factor protein HSF8                         |
| C12731       | 6.108                         | DNA binding/transcription factor                       |
| C54729       | 5.725                         | Scarecrow-like transcription factor 11                 |
| C49297       | 5.700                         | Myb family transcription factor                        |
| C58385       | 5.899                         | CKB3; protein kinase regulator                         |
| C18736       | 5.689                         | Transcription factor jumonji domain-containing protein |
| C1441        | 5.589                         | Similar tp transcription factors                       |
| C52124       | 5.425                         | Transcription factor AP2-EREBP                         |
| C32284       | 5.256                         | GBF's pro-rich region-interacting factor 1             |
| C9294        | 2.074                         | PHD finger transcription factor-like                   |
| C44773       | 1.138                         | Ethylene-responsive transcription factor               |
| C12005       | 1.072                         | Basic helix-loop-helixfamily protein                   |
| C51733       | 1.064                         | ABA-inducible BHLH-type transcription factor           |
| C18668       | 1.012                         | DRE transcription factor 1                             |

doi:10.1371/journal.pone.0054573.t005

include: Ent-kaurene oxidase (KOS), ABA 8-hydroxylases (ABA8OX), Calmodulin-like protein (CLP), AP2/ERF domain-containing transcription factor (AP2/ERF), Patatin-like protein (PLP), Sucrose non-fermenting related protein kinase I (SnRK1), FD, zinc finger CONSTANS-like protein and Lipoxygenase (LOX), which are involved in corm formation. Overall, expression analysis of eight genes for the three developmental stages i.e. stolon, initial swelling, and swelling stage by qRT-PCR showed similar tendency as found in Tag-sequencing, which indicates a correspondence of the results from qRT-PCR analysis with the Tag sequencing analysis. Only one gene (*FD*) was observed with some difference in transcriptional level between Tag-sequencing analysis and qRT-PCR data (Fig. 3). The expression of *FD* with qRT-PCR analysis showed no significant change in C1/C2

libraries, whereas it showed some enhancement in C2/C3 libraries.

## Discussion

### Tag-sequencing Based Analysis of Transcriptome Expressed during Corm Formation

High throughput tag-sequencing is being applied to study plant development, and many regulatory mechanisms at molecular level have been identified [34,35,37,38]. Tag-mapped genes have been testified to fully cover the whole plant genome, although a large number of genes have not been annotated [35]. In this study, genes which showed differential expression during corm formation were analyzed using tag-sequencing technique. Approximately 6.0 million tags were identified per library, and 5854021, 5983454,

**Table 6.** Expressed abundance of some corm formation related genes identified previously.

| Gene ID | Assetion     | TPM-C1 | TPM-C2 | TPM-C3 | Function annotation                       | References                  |
|---------|--------------|--------|--------|--------|-------------------------------------------|-----------------------------|
| C4528   | gi 240255318 | 0.01   | 2.17   | 4.52   | FD (Flowering locus D)                    | Sarkar 2008                 |
| C9851   | gi 115440895 | 0.85   | 73.2   | 76.4   | zinc finger CONSTANS-like protein         | Martinez-Garcia et al. 2002 |
| C5936   | gi 145712966 | 19.3   | 5.52   | 5.03   | GIGANTEA (clock-regulated protein)        | Abelenda et al. 2011        |
| C792    | gi 145617255 | 0.34   | 0.01   | 0.01   | MADS-box transcription factor             | Hannapel et al. 2004        |
| C12711  | gi 157674589 | 0.51   | 0.34   | 0.01   | FRUITFUL-like protein                     | Abelenda et al. 2011        |
| C54289  | gi 159479168 | 12.13  | 20.56  | 16.49  | SFT family                                | Krieger et al. 2010         |
| C59218  | gi 15231491  | 24.77  | 24.44  | 20.14  | photoperiod sensitivity 5 (SE5)           | Tsuji et al. 2010           |
| C9570   | gi 15232818  | 4.61   | 9.69   | 1.39   | Cycling Dof Factor                        | Imaizumi et al. 2005        |
| C48167  | gi 84453182  | 1.37   | 5.34   | 1.22   | BEL1-like HD transcription factor         | Banerjee et al. 2006        |
| C5539   | gi 258958638 | 44.41  | 23.9   | 10.07  | knox protein                              | Hay and Tsiantis 2010       |
| C58867  | gi 1814234   | 45.78  | 25.08  | 36.45  | Knox protein partner                      | Chen et al. 2004            |
| C22645  | gi 78191448  | 182.99 | 198.21 | 80.71  | ADP/ATP translocator-like                 | Tjaden et al.1998           |
| C59398  | gi 55741123  | 0.51   | 3.34   | 1.01   | Sucrose synthase                          | Fernie and Willmitzer 2001  |
| C17314  | gi 115459158 | 0.01   | 4.35   | 8.33   | Ca <sup>2+</sup> /Calmodulin-like protein | Kim et al. 2009             |
| C51000  | gi 32454708  | 0.01   | 0.33   | 0.02   | Lipoxygenase                              | Koloniets et al. 2001       |
| C1771   | gi 258676531 | 12.98  | 9.53   | 4.69   | AFB auxin receptor protein pintaTIR1      | Nishimura et al. 2009       |

TPM, transcripts per million clean tags.  
doi:10.1371/journal.pone.0054573.t006

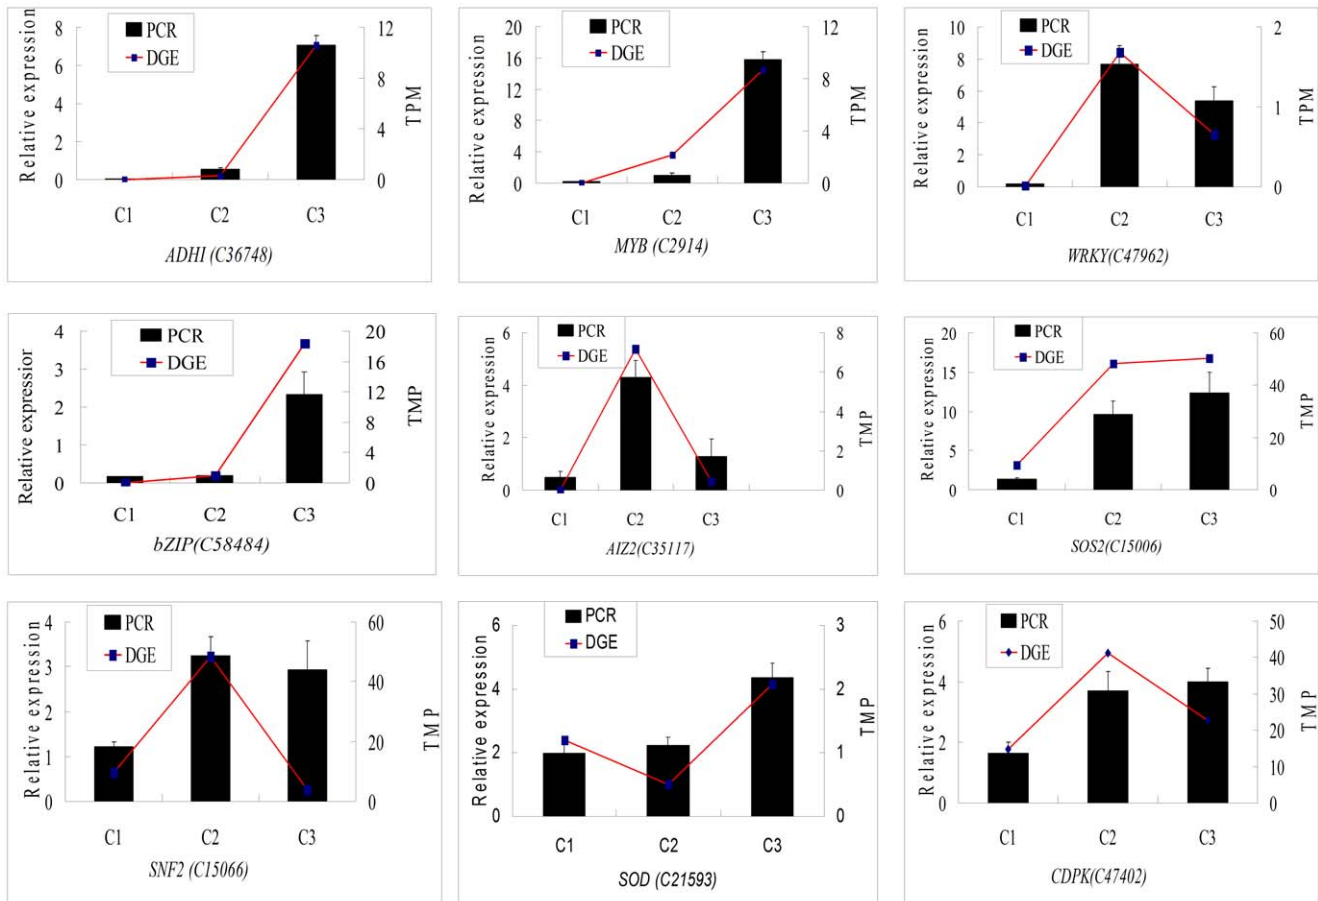

**Figure 3.** Validation of tag-mapped genes from three stages of *Sagittaria trifolia* with quantitative RT-PCR.

doi:10.1371/journal.pone.0054573.g003



and 5761079 clean tags were obtained. Only 20575, 19807, and 18438 genes from C1, C2, and C3 libraries, respectively, could be annotated, due to unavailability of complete genome of *Sagittaria trifolia* (Table 2). We found that many genes changed their transcriptional level significantly, during corm formation. The number of DEGs in C1/C2 libraries was more than that of C2/C3 libraries (Table 3), suggesting that regulations from stolon stage to initial swelling stage were more complex as compared with that of initial swelling stage to swelling stage.

### Identification of DEGs in C1, C2, and C3 Libraries

DEGs in three libraries were involved in the transport signal transduction, small molecular biosynthesis, transcription, cell cycle, response to the stimuli, organelle organization, anatomical structure development, cell differentiation, translation, organ development, cellular macromolecular metabolic processes, energy, and cellular component organization (data not shown). Among 20 DEGs in C1/C2 libraries with higher levels of changes, are involved in hormone synthesis and response, energy metabolism, and response to stresses. In C2/C3 libraries, however, the expression profiles of major DEGs were relevant to the formation of storage organ. All genes enhanced expression in C1/C2 and C2/C3 were listed in Table S1.

### Energy Metabolism

Most species of *Sagittaria trifolia* are damaged when submerged under water for long periods [39], therefore, *Sagittaria* must adapt to oxygen shortage during growth. This might be the major reason why many submergence responsive genes were found to improve the expression in C1/C2 libraries, such as *adh* (C36748), *myb* (C17437), *WRKY* (C12669), *bZIP* (C57104) and anaerobically inducible early gene (C35117) (Table 4, Table S1). It was reported that energy regulation was a measure to alleviate the hurt acquired because of submergence [40,41,42], and at the same time, many critical processes for storage organ formation also need energy consumption [43]. Thus special regulation of gene expression can provide enough energy and metabolic components to support the need of developing storage organ.

ATP is normally generated from glycolysis in plant cell to sustain plant growth. For generation of ATP, ATP/ADP translocator (C48129) is thought to be a gated pore through which ADP and ATP are exchanged between the mitochondrial matrix and the cytoplasm. ATP/ADP translocator is an inner membrane protein which is observed to enhance the tuber number and changes tuber morphology in transgenic plant [44]. Evidence shows that delivery of NADPH, NADH, reduced ferredoxin and ATP, in the specific cellular compartments will happen for energy-consuming reactions due to limitation of pool sizes of these energy carriers. Generally, NADPH, NADH and reduced ferredoxin are not directly transported across bio-membranes, therefore, indirect transport of reducing equivalents is achieved by malate/oxaloacetate shuttles, involving malate dehydrogenase (MDH) and NADP-MDH (Isoenzyme of MDH) for the interconversion of oxaloacetic acid and malate [45,46]. MDH is one of the more active enzymes in peroxisomes, mitochondria, chloroplast, glyoxysomes, and cytoplasm. The activities of the enzymes of malate and NADP-MDH valves was changed when plants are subjected to conditions such as high light, high CO<sub>2</sub>, nutrition or stresses.

A lot of evidences show that NADP-MDH is involved in response to environmental factors. When plants are subjected to stress conditions, which require changed activities of the enzymes of malate valves, changed expression levels of MDH isoforms can be observed. Hameister et al. (2007) analyzed transcriptional regulation of NADP-MDH in *Himatanthus sucuba* and in some

plants from Brassicaceae, the amount of transcripts increases twofold after transferring to stress condition [47]. Monitoring the expression changes in NADP-MDH after a transfer into conditions of persisting over-reduction, i.e. a transfer of Arabidopsis plants into high light levels and moderately decreased temperature, Becker et al. (2006) find found that both transcript and protein amount of NADP-MDH are up-regulated within a few hours [48]. NADP-MDH activity is nearly tenfold higher on a chlorophyll basis in cold-grown winter wheat, as compared to control plants grown with low temperature stress. When facultative CAM plants, *Mesembryanthemum crystallinum* and rice are exposed to salt stress, the total NADP-MDH activity is also higher as compared with the control conditions [49,50]. It is evident from the above studies that an increase in NADP-MDH activity during the corm formation probably had two important roles: one is provision with the energy for corm development and the other is to promote adaptation of plant to submergence. In addition, FAD binding containing protein (C58652), ATPase (C24284), phosphoenolpyruvate carboxylase (C59661) and pyruvate dehydrogenase (C54727) were also observed to improve expression during this process. In this study, the expression of ATP/ADP translocator had no novel change in C1/C2 libraries, and was decreased in C2/C3 libraries, therefore, enhanced expression of MDH (C28383) and NADP-MDH (C58557) might be an adaptive response for *Sagittaria trifolia* to against submergence.

### Carbohydrate/storage Metabolism

Starch is the most important component found in the corm (storage organ) of *Sagittaria trifolia*. It is reported that swelling of storage organ and accumulation of starch occur simultaneously [51]. Therefore, synthesis of starch shows high coordination with formation of storage organ [52]. In this experiment, the expression of a gene encoding granule-bound starch synthase was enhanced during the corm development (Table 4). Granule-bound starch synthase is believed to have a higher amounts of starch synthesized in plant storage organs [53].

Until now, two kinds of granule-bound starch synthase (*GBSSI* and *GBSSII*) exist in the plant kingdom with different expression profiles. In rice, the content of amylose is increased in transgenic plants containing *GBSSI* as compared with that of the control plants. Further examination shows that the difference in amount of amylose in transgenic and non-transgenic plants results from long unit chains of amylopectin, which is similar to the report of Hanashiro et al. (2008) [54]. The DEG found in our study belonged to *GBSSI* (C41150), whereas we did not find *GBSSII* gene expression due to two possible reasons: either *GBSSII* does not exist in the *Sagittaria* genome; or *GBSSII* was not expressed in the corm during the developmental period.

Patatin, which is identical to glycoprotein, is usually believed as a major storage protein in corm, tuber, rhizome, and bulb. We found that expression of *patatin* (C16333) decreased in C1/C2 libraries, and enhanced in C2/C3 libraries. The above result implied that patatin accumulated in the swelling stage. In some species of potato, 40% soluble tuber protein is derived from patatin. Compared with other storage proteins, patatin is more stable because no degradation products are detected during tuber development. Evidence shows that *patatin* might be involved in metabolism because acyl hydrolase has been found to be encoded by this gene [55,56]. Another study shows that *patatin* is involved in pollen development [57,58], which is further testified by Vancanneyt et al. (1989). [59]. Perl et al. and Bamfalvi et al. (1994) have documented the function of patatin which is associated with early events of formation of storage organ underground according to its expression profile [60,61]. A small

amount of patatin is found in stolon tips from non-induced plants, but rapidly accumulates during tuberization [62]. In addition, patatin is observed to be synthesized only in stolon and tuber, and its accumulation has high correlation with tuber swell [63]. Rocha-Sosa et al (1989) observed that the expression of *patatin* in non-tuber tissues is induced by sucrose, although sucrose is not believed to directly regulate patatin gene expression [64,65].

Accumulation of sugar through photosynthesis is the most fundamental event in the whole life of plant, because it supports plants to adjust some physiological activities and provide enough materials and energy to complete those activities [66]. Therefore, the processes of sugar synthesis, transport, consumption, and storage have been widely studied in past years [67]. It has been testified that soluble carbohydrates, most notably sucrose, have convincingly been described to be strong inducers for formation of underground storage organ [68], because increasing concentration of sucrose in medium during cultivation leads to more numbers of tubers [12]. Sucrose leading to more tuber numbers mainly presents its role as an inducing signal molecule and increase in the level of sucrose in stolons results in an increased number of initiated tubers [69]. We found that expression of gene (Sucrose synthase: C59398) involved in sucrose synthesis was enhanced at transcriptional level in C1/C2 libraries (Table S1), suggesting that accumulation of sucrose is helpful for corm formation of *Sagittaria*. Further evidence also shows that SNF1 kinase (the sucrose non-fermenting-1) is involved in sugar-signaling pathways to regulate metabolism of carbohydrate or other storage proteins [70]. From the characteristics of gene expression, SNF1 (C50647) showed enhanced expression, which undoubtedly promoted the formation and development of corm (Table 4, Table S1).

### Up-regulation of Transcription Factors during Corm Formation

Gene expression is regulated by transcription factors which is a crucial part of the plant response to control the entire metabolic processes. Expression levels of 19 and 14 transcription factors were enhanced in C1/C2 and C2/C3 libraries, respectively (Table 5). For these transcription factors, we found that CaM-binding protein and AP2-EREBP (C52124) have been identified to play critical roles in the formation of underground storage organ.  $Ca^{2+}$  has been developed as a second messenger to perceive endogenous and exogenous signals before system responses [71]. Calmodulin is characterized as  $Ca^{2+}$  sensor, and a variety of cellular processes are modulated after  $Ca^{2+}$  binds to CaM [72].  $Ca^{2+}$ /CaM have already been testified to be involved in the formation of storage organs [73]. Further study shows that overexpression of a CaM gene (*PCMI*) in potato plants produces more elongated tuber [74]. In addition, CaM-binding proteins have been found in many plants and their functions have also been identified that they are involved in the development of underground storage organs [71,75].

A potato CaM-binding protein (PCBP) is found to play an important role in signaling transduction during tuber formation according to characteristics of its expression [76]. We observed that calmodulin-like protein (C17314) and calmodulin binding protein (C54598) have similar expression profiles in C1/C2 libraries and C2/C3 libraries. From stolon to initial swelling stage of corm, expression levels of these two genes improved, and decreased from initial swelling stage to swelling stage, indicating that  $Ca^{2+}$ /CaM might be involved in processes from stolon stage to initial swelling stage of corm.

In this study, the expression level of ethylene responsive factor was found to be enhanced (Table 5). From the characteristics of expression, we could conclude that this gene play an important

role in corm formation. Ethylene is not only involved in a range of biotic and abiotic stress responses, especially to help wetland plants to adapt to anaerobic condition, but also mediates swelling of underground storage organs [77]. At the same time, AP2/EREBP gene (Ethylene-responsive element binding proteins), which is unique in plant kingdom also shows multi-functions in metabolism from response to stresses to regulation of plant development [78]. Overexpression of *StEREBP* confers potato plant more resistance to abiotic stress, whereas down-regulation of *AP2/EREBP* leads to a series of other effects such as decreased cell size, plant height, hypocotyl elongation and fertility [79].

In addition, several AP2 members are found to be involved in controlling flowering time [80]. Cernac and Benning (2004) reports that a putative AP2/EREBP transcription factor, *WR11* controls the seed storage metabolism in Arabidopsis, because overexpression of this gene causes enhancement in the oil content of seed and triacylglycerols in developing seedlings [81]. Overexpression of an *EREBP* in rice can increase the expression of waxy gene which directly results in a change of storage content [82]. Evidence shows that AP2/EREBP is involved in abscisic acid and sugar signal transduction pathway according to its expression [83]. Therefore, future studies should also be focused to identify the role of AP2/EREBP in corm formation with transgenic techniques.

### Hormonal Regulation

Swelling of underground storage organ is affected by various environmental and endogenous factors. Short photoperiods, low temperatures, low nitrogen and hormone favor the formation of storage organ [68]. In literature, many reports describe the importance of gibberellic acid (GA), abscisic acid (ABA), IAA, ethylene for the formation of storage organ. GA content is enhanced in transgenic plants by overexpression of GA oxidase gene, and elevation of GA content leads to transgenic potato plants that require a longer duration of short-day photoperiods to form tubers. Whereas, inhibition of this enzyme activity results in earlier tuberizing as compared with that of control plants [24].

A dwarf mutant of *S. tuberosum* ssp. *Andigena* showed a decrease in GA content which could tuberize both in LD and SD condition. However, when GA biosynthesis is inhibited, plants cannot tuberize in SD [18]. These results show that GA is probably involved in the photoperiodic induction to regulate the formation of storage organ. In addition, Xu et al. (1998) [84] observed that high content of GA promotes stolon elongation and inhibit corm formation. In this study, ent-kaurene oxidase CYP701A5 and ent-kaurene synthase (18552) involved in GA biosynthesis pathway enhanced the transcriptional level in C1/C2 libraries, whereas it decreased in C2/C3 libraries (Table 4, Table S1). Enhancing GA level in C1/C2 libraries probably benefited the elongation of stolon and decreased GA level in C2/C3 libraries and might have benefited the corm swell.

Several studies have been performed to study the effects of ABA on the swell of underground storage organ. Application of exogenous ABA increases endogenous ABA level of plant under tuber-inducing conditions, which results in the earlier initiation of tuber, the formation of tubers and enhancement of tuber number [85,86]. Same phenomenon is also found when plant is promoted to form tuber when exogenous ABA is applied [87]. Xu et al. (1998) [84] observed that exogenous ABA stimulates tuberization and reduced stolon length under normal growth condition. However, Hussey and Stacey [88](1980) found that tuberization is blocked by ABA, and exogenous ABA prolongs the process of tuber formation. The expression of a gene encoding ABA hydroxylase (C8055) was enhanced in C1/C2 libraries and the enhanced transcriptional level undoubtedly decreased content of

ABA in initial swelling period, which indicates that low ABA content benefited corm formation of *Sagittaria trifolia*. In addition, the expression of some identified corm-related genes was also documented in this study (Table 6), and most of these genes were relevant to flowering and hormone response. Overall, according to the gene expression profiles, we conclude that formation of corm was regulated by multiple genes.

## Conclusions

Gene expression of three libraries with different developmental stages for corm formation was studied using high-throughput tag-sequencing based on Solexa Genome Analyzer Platform. Based on results of tag-sequencing, 20575, 19807, and 18438 tags were annotated in three stages (stolon stage, initial swelling stages and swelling stage) respectively after comparison through the existing databases. In addition, a number of important differentially expressed genes relevant to corm development were found from these three libraries. Quantitative RT-PCR for nine genes was used to identify the results of tag-sequencing, and the results revealed that gene expression by qRT-PCR showed high correlation to the Tag sequencing analysis.

## Supporting Information

**Figure S1 GO analysis of genes expressed during the corm formation.** All the genes identified in C1/C2 and C2/C3

## References

- Porterfield MM (1951) The principal Chinese vegetable foods and food plants of Chinatowns marks. *Eco Bot* 3: 3–37.
- Ershow AG, Chen-Wong K (1990) Chinese food composition tables an annotated translation of the 1981 edition published by the Institute of Nutrition and Food Hygiene, Chinese Academy of Preventive, Beijing. *J Food Compos Anal* 3: 191–434.
- Zheng XW, Wei XD, Nan P, Zhong Y, Chen JK (2006) Chemical composition and antimicrobial activity of the essential oil of *Sagittaria trifolia*. *Chem. Nat. Compd* 42: 520–522.
- Han SS (1993) Reproductive growth and competitive ecology of arrowhead (*Sagittaria trifolia* L.) - (1) - Growth and tuber formation of arrowhead under several environmental factors. *Korean J of Weed Sci* 13: 138–150.
- Vartapetian BB, Jackson M (1997) Plant adaptations to anaerobic stress. *Ann of Bot* 79: 3–20.
- Vreugdenhil D, Struijk PC (1989) An integrated view of the hormonal regulation of tuber formation in potato (*Solanum tuberosum*). *Physiol Plant* 75: 525–531.
- Hannapel DJ (1991) Characterization of the early events of potato tuber development. *Physiol. Plant* 83: 568–573.
- MacLeod RAF, Dirks WG, Matsuo Y, Kaufmann M, Milch H, et al. (1999) Widespread intraspecies cross-contamination of human tumor cell lines arising at source. *Int J Cancer*. 83: 555–563.
- Paiva E, Lister RM, Park WD (1983) Induction and accumulation of major tuber proteins of potato in stems and petioles. *Plant Physiol* 71: 161–168.
- Park WM (1983) Tuber proteins of potato- a new and surprising molecular system. *Plant Mol Biol Rep* 1: 61–66.
- Shigeya Y, Hisao K, Kunikazu U (1981) Effects of Photoperiodic Treatment on Growth and Propagule Production of Arrowhead, *Sagittaria trifolia* L. *J Weed Sci Technol* 26: 118–122.
- Jackson SD (1999) Multiple signaling pathways control tuber induction in potato. *Plant Physiol* 119: 1–8.
- Inui H, Ogura Y, Kiyosue T (2010) Overexpression of Arabidopsis thaliana LOV KELCH REPEAT PROTEIN 2 promotes tuberization in potato (*Solanum tuberosum* cv. May Queen). *FEBS Lett*. 584: 2393–2396.
- Martínez-García JF, Virgos-Soler A, Prat S (2002) Control of photoperiod-regulated tuberization in potato by the Arabidopsis flowering-time gene *constans*. *PNAS* 99: 15211–15216.
- Kim WY, Fujiwara S, Suh SS, Kim J, Kim Y, et al. (2007) ZEITLUPE is a circadian photoreceptor stabilized by GIGANTEA in blue light. *Nat* 449: 356–360.
- Chen H, Banerjee AK, Hannapel DJ (2004) The tandem complex of BEL and Knox partners is required for transcriptional repression of *ga2ox1*. *Plant J*. 38: 276–284.
- Abelenda JA, Navarro C, Prat S (2011). From the model to the crop: genes controlling tuber formation in potato. *Cur Opin in Biotech* 22: 287–292.
- Jackson S, Heyer A, Dietze J, Prat S (1996) Phytochrome B mediates the photoperiodic control of tuber formation in potato. *Plant J* 9: 159–166.

libraries were classified into 26 classifications according to gene functions (TIF)

**Figure S2 Sequencing saturation analysis of three libraries.** C1: tag-sequencing for stolon stage; C2: tag-sequencing for initial swelling stage; C3: tag-sequencing for swelling stage (TIF)

**Table S1 Genes were found to enhance their expression in C1/C2 and C2/C3 libraries.** These genes were listed in descending order according to alteration of expression during corm formation. (XLS)

## Acknowledgments

Authors thank Professor Martin for his language check. We also extend our thanks to some members of BIG for their cooperation in obtaining high throughput sequence assembly of the *Sagittaria trifolia*.

## Author Contributions

Conceived and designed the experiments: LL XC. Performed the experiments: LC SL. Analyzed the data: XX JH JY YZ. Contributed reagents/materials/analysis tools: JY YZ. Wrote the paper: LC SL.

- Alisdair RF, Willmitzer L (2001) Molecular and biochemical triggers of potato. *Plant Physiol* 127: 1459–1465.
- Appeldoorn NJG, de Bruijn SM, Koot-Gronsveld EAM, Visser RGF, Vreugdenhil D, et al. (1997) Developmental changes of enzymes involved in conversion of sucrose to hexose-phosphate during early tuberization of potato. *Planta* 202: 220–226.
- Jasik J, de Klerk GJ (2006) Effect of methyl jasmonate on morphology and dormancy development in lily bulblets regenerated *in vitro*. *J Plant Growth Regu* 25: 45–51.
- Kim KJ, Kim KS (2005) Changes of endogenous growth substances during bulb maturation after flowering in *Lilium* oriental hybrid ‘Casa Blanca’ *Acta Hort* 570: 661–667.
- Usha PR, Rajasekaran RL, Claude DC, Samuel KA, Kevin JS (2011) Role of ethylene and jasmonic acid on rhizome induction and growth in rhubarb (*Rheum rhabarbarum* L.). *Plant Cell Tiss Organ Cult* 105: 253–263.
- Carrera E, Bou J, Garcia-Martinez JL, Prat S (2000) Changes in GA 20-oxidase gene expression strongly affect stem length, tuber induction and tuber yield of potato plants. *Plant J* 22: 247–256.
- Galis I, Macas J, Vlasak J, Ondrej M, van Onckelen HA (1995) The effect of an elevated cytokinin level using the ipt gene and N-6 benzyladenine on a single node and intact potato plant tuberization *in vitro*. *J Plant Growth Regul* 14: 143–150.
- Bhat SR, Chandel KPS, Kacker A (1994) *In vitro* induction of rhizomes in zinger (*Zingiber officinale* Rosc.). *Indian J Expt Biol* 32: 340–344.
- Vreugdenhil D, Bindels P, Reinhoud P, Klocek J, Hendriks T (1994) Use of the growth retardant tetracyclis for potato tuber formation *in vitro*. *J Plant Growth Regul* 14: 257–265.
- himann KV, Skoog F (1934) On the inhibition of bud development and other functions of growth substance in *Vicia faba*. *Proc. R. Soc. Lond. B Biol. Sci* 114: 317–339.
- Abeles FB, Morgan PW, Saltveit ME Jr. (1992) Ethylene in Plant Biology. San Diego: Academic Press.
- Neuteboom CE, Lada RL, Caldwell CD, Eaton L, Havard P (2002) Ethephon and spermidine enhance bulking in dicar carrots (*Daucus carota* var. sativus). *PGRSAQ* 30: 77.
- Mingo-Castel AM, Smith OE, Kumamoto J (1976) Studies on the carbon dioxide promotion and ethylene inhibition of tuberization in potato explants cultured *in vitro*. *Plant Physiol* 57: 480–485.
- Bentley DR (2006) Whole-genome re-sequencing. *Curr Opin Genet Dev* 16: 545–552.
- Ansorge WJ (2009) Next-generation DNA sequencing techniques. *New Biotechnol* 25: 195–203.
- Qj XH, Xu XW, Lin XJ, Zhang WJ, Chen XH (2011) Identification of differentially expressed genes in cucumber (*Cucumis sativus* L.) root under waterlogging stress by digital gene expression profile. *Genomics*. doi:10.1016/j.ygeno.2011.12.008.

35. Wang QQ, Liu F, Chen XS, Ma XJ, Zeng HQ, et al. (2010) Transcriptome profiling of early developing cotton fiber by deep-sequencing reveals significantly differential expression of genes in a fuzzless/lintless mutant. *Genomics* 96: 369–376.
36. Mach J (2011) Unpurecing the tomato layers of information revealed by microdissection and high-throughput transcriptome sequencing. *Plant Cell*. doi: 10.1105/tpc.111.231111.
37. Wang FD, Li LB, Li HY, Liu LF, Zhang YH, et al. (2012) Transcriptome analysis of rosette and folding leaves in Chinese cabbage using high-throughput RNA sequencing. *Genomics*. doi: 10.1016/j.ygeno.02.005.
38. Wu T, Qin ZW, Zhou X Y, Feng Z, Du YL (2010) Transcriptome profile analysis of floral sex determination in cucumber. *J Plant Physiol* 167: 905–913.
39. Vartapetian BB, Andreeva IN, Maslova IP, Davtian NG (1970) The oxygen and ultrastructure of root cells. *Agrochimica* 15: 1–19.
40. Bailey-Serres J, Voisenek L ACJ (2008) Flooding stress: acclimations and genetic diversity. *Annu Rev Plant Biol* 59: 313–339.
41. Pederson O, Rich SM, Colmer TD (2009) Surviving floods: leaf gas films improve O<sub>2</sub> and CO<sub>2</sub> exchange, root aeration, and growth of completely submerged rice. *Plant J* 58: 147–156.
42. Rocha M, Licausi F, Araujo W L, Nunes-Nesi A, Sodek L, et al. (2010) Glycolysis and the tricarboxylic acid cycle are linked by alanine aminotransferase during hypoxia induced by waterlogging of lotus japonicus. *Plant Physiol* 152: 1501–1513.
43. Geigenberger P, Stitt M, Fernie AR (2004) Metabolic control analysis and regulation of the conversion of sucrose to starch in growing potato tubers. *Plant Cell Environ* 27: 655–673.
44. Tjaden J, Mohlmann T, Kampfenkel K, Henrichs G, Neuhaus HE (1998) Altered plastidic ATP/ADP-transporter activity influences potato tuber morphology, yield and composition of starch. *Plant J* 16: 531–540.
45. Giel C (1992) Malate dehydrogenase isoenzymes: cellular locations and role in the flow of metabolites between the cytoplasm and cell organelles. *Biochem Biophys Acta* 1100: 217–234.
46. Scheibe R (2004) Malate valves to balance cellular energy supply. *Physiol Plant* 120: 21–26.
47. Hameister S, Becker B, Holtgreffe S, Strodtkotter I, Linke V, et al (2007) Transcriptional regulation of the NADP dependent malate dehydrogenase: comparative genetics and identification of DNA-binding proteins. *J Mol Evol* 65: 437–455.
48. Becker B, Holtgreffe S, Jung S, Wunrau C, Kandlbinder A, et al. (2006) Influence of the photoperiod on redox regulation and stress responses in *Arabidopsis thaliana* L. (Heynh.) plants under long- and short-day conditions. *Planta* 224: 380–393.
49. Cushman JC (1993) Molecular cloning and expression of chloroplast NADP-malate dehydrogenase during Crassulacean acid metabolism induction by salt stress. *Photosynth Res* 35: 15–27.
50. Sahi C, Singh A, Kumar K, Blumwald E, Grover A (2006) Salt stress response in rice: genetics, molecular biology, and comparative genomics. *Func Inter Genomics* 6: 263–284.
51. Burton WG, Van Es A, Hartmans KJ (1992) The physics and physiology of storage. *The Potato Crop* 2: 608–727.
52. Geigenberger P, Merlo L, Reimholz R, Stitt M (1994) When growing potato tubers are detached from their mother plant there is a rapid inhibition of starch synthesis, involving inhibition of ADP-glucose pyrophosphorylase. *Planta* 193: 486–493.
53. Nakamura T, Vrinten P, Hayakawa K, Ikeda J (1998) Characterization of a Granule-Bound Starch Synthase Isoform Found in the Pericarp of Wheat. *Plant Physiol*. 118: 451–459.
54. Hanashiro I, Itoh K, Kuratomi Y, Yamazaki M, Igarashi T, et al. (2008) Granule-Bound Starch Synthase I is Responsible for Biosynthesis of Extra-Long Unit Chains of Amylopectin in Rice. *Plant Cell Physiol* 49: 925–933.
55. Racusen D (1985). Patatin and esterase in desire potato tuber. *Food Ind* 9: 61–367.
56. Andrews DL, Beames B, Summers MD, Park WD (1988). Characterisation of the lipid acyl hydrolase activity of the major potato (*Solanum tuberosum*) tuber protein, patatin, by cloning and abundant expression in a baculovirus vector. *Biochem J* 252: 199–206.
57. Sawhney VK, Nave EB (1986) Enzymatic changes in post-meiotic anther development in *Petunia hybrida*. 11. Histochemical localisation of esterase, peroxidase, malate- and alcohol dehydrogenase. *J Plant Physiol* 125: 467–473.
58. Delvallee I, Dumas C (1988) Anther development in *Zea mays*: Changes in protein, peroxidase, and esterase patterns. *J Plant Physiol* 132: 210–217.
59. Vancanneyt G, Sonnewald U, Hofgen R, Willmitzer (1989) Expression of a patatin-like protein in the anthers of potato and sweet pepper flowers. *Plant Cell* 533–540.
60. Perl A, Aviv D, Willmitzer L, Galun E (1991) In vitro tuberization in transgenic potatoes harboring 13-glucuronidase linked to a patatin promoter: effects of sucrose levels and photoperiods. *Plant Sci* 73: 87–95.
61. Bamfalvi Z, Kostyal Z, Barta E (1994) *Solanum brevifolium* possesses a non-sucrose-inducible patatin gene. *Mol Genet* 245: 517–522.
62. Hannapel DJ, Miller J C, Park WD (1985) Regulation of Potato Tuber Protein Accumulation by Gibberellic Acid. *Plant Physiol* 78: 700–703.
63. Stupar RM, Beaubien KA, Jin WW, Song JQ, Lee MK, et al. (2006) Structural Diversity and Differential Transcription of the Patatin Multicopy Gene Family During Potato Tuber Development. *Genetics* 172: 1263–1275.
64. Rocha-Sosa M, Sonnewald U, Frommer W, Stratmann M, Schell J (1989) Both developmental and metabolic signals activate the promoter of a class I patatin gene. *EMBO J* 8: 23–29.
65. Grierson C, Du JS, de Torres ZM, Beggs K, Smith C (1994) Separate cis sequences and trans factors direct metabolic and developmental regulation of a potato tuber storage protein gene. *Plant J* 5: 815–826.
66. Gibson SI (2005) Control of plant development and gene expression by sugar signaling. *Cur Opin in Plant Biol* 8: 93–102.
67. Sheen J, Zhou L, Jang JC (1999) Sugars as signaling molecules. *Cur Opin in Plant Biol* 2: 410–418.
68. Fernie AR, Willmitzer L (2001) Molecular and biochemical triggers of potato tuber development. *Plant Physiol* 127: 1459–1465.
69. Dijkwel PP, Huijser C, Weisbeek PJ, Chua NH, Smeeckens SCM (1997) Sucrose control of phytochrome A signaling in *Arabidopsis*. *Plant Cell* 9: 583–595.
70. Tiessen A, Prescha K, Branscheid A, Palacios N, Mckibbin R, et al. (2003) Evidence that SNF1-related kinase and hexokinase are involved in separate sugar-signaling pathways modulating post-translational redox activation of ADP-glucose pyrophosphorylase in potato tubers. *Plant J* 35: 490–500.
71. Kim MC, Chung WS, Yun DJ, Cho M J (2009) Calcium and calmodulin-mediated regulation of gene expression in plants. *Mol Plant* 2: 13–21.
72. Hoefflich KP, Ikura M (2002). Calmodulin in action: diversity in target recognition and activation mechanisms. *Cell* 108: 739–742.
73. Balamani V, Veluthambi K, Poovaiah BW (1986) Effect of calcium on tuberization in potato (*Solanum tuberosum* L.). *Plant Physiol* 80: 856–858.
74. Poovaiah BW, Takezawa D, An G, Han TJ (1996) Regulated expression of a calmodulin isoform alters growth and development in potato. *J. Plant Physiol* 149: 553–558.
75. Bouche N, Scharlat A, Snedden W, Bouchez D, Fromm H (2002). A novel family of calmodulin-binding transcription activators in multicellular organisms. *J Biol Chem* 277: 21851–21861.
76. Reddy ASN, Safadi F, Narasimhulu SB, Golovkin M, Hu X (1996) Isolation of a novel calmodulin-binding protein from *Arabidopsis thaliana*. *J Biol Chem* 271: 7052–7060.
77. Suge H, Kusanagi T (1975) Ethylene and carbon dioxide: regulation of growth in two perennial aquatic plants, arrowhead and pondweed. *Plant Cell Physiol* 16, 65–72.
78. Krizek BA (2009) Aintegumenta and aintegumenta6 act redundantly to regulate *Arabidopsis* floral growth and patterning. *Plant Physiol* 150: 1916–1929.
79. Dietz KJ, Vogel MO, Viehhauser A (2010) AP2/EREBP transcription factors are part of gene regulatory networks and integrate metabolic, hormonal and environmental signals in stress acclimation and retrograde signaling. *Protoplasma* 245: 3–14.
80. Feng JX, Liu D, Pan Y, Gong W, Ma LG, et al. (2005). An annotation update via cDNA sequence analysis and comprehensive profiling of developmental, hormonal or environmental responsiveness of the *Arabidopsis* AP2/EREBP transcription factor gene family. *Plant Mol Biol* 59: 853–868.
81. Cernac A, Benning C (2004) WRINKLED1 encodes an AP2/EREB domain protein involved in the control of storage compound biosynthesis in *Arabidopsis*. *Plant J* 40: 575–585.
82. Zhu Y, Cai XL, Wang ZY, Hong MM (2003) An interaction between a MYC protein and an EREBP protein is involved in transcriptional regulation of the rice Wax gene. *J Biol Chem* 278: 47803–47811.
83. Rook F, Corke F, Card R, Munz G, Smith C, et al. (2001) Impaired Suc-induction mutants reveal the modulation of sugar-induced starch biosynthetic gene expression by abscisic acid signalling. *Plant J* 26: 421–433.
84. Xu X, van Lammeren AAM, Vermeer E, Vreugdenhil D (1998) The role of gibberellin, abscisic acid, and sucrose in the regulation of potato tuber formation in vitro. *Plant Physiol* 117: 575–584.
85. Abdullah ZN, Ahmad R (1980) Effect of ABA and GA<sub>3</sub> on tuberization and some chemical constituents of potato. *Plant Cell Physiol* 21: 1343–1346.
86. Menzel BM (1980) Tuberization in potato (*Solanum tuberosum*) cultivar Sebago at high temperatures: responses to gibberellin and growth inhibitors. *Ann Bot* 46: 259–266.
87. El-Antably H M M, Wareing P F, Hillman J (1967) Some physiological responses to *d,l*-abscisic acid (dormin). *Planta* 3: 74–90.
88. Hussey B, Stacey NJ (1981) In vitro propagation of potato (*Solanum tuberosum*). *Annal. Bot* 787–96.
